# Supplementary material for: T helper type 1 and 17 cells determine efficacy of interferon-β in multiple sclerosis and experimental encephalomyelitis
Source: Springer Nature journal article supplement (doi:10.1038/nm.2110), 2010-03-28
Supplement: 41591_2010_BFnm2110_MOESM4_ESM.pdf [file 41591_2010_BFnm2110_MOESM4_ESM.pdf]

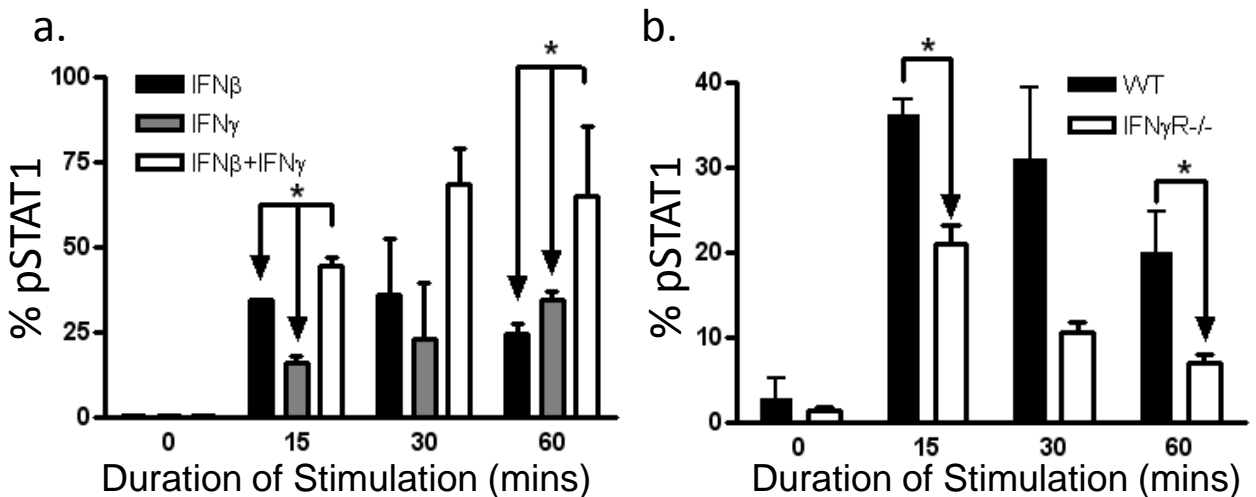

**Supplementary Fig. 1: Synergy of IFN- $\beta$  and IFN- $\gamma$  on STAT1 activation.** a) Spleen cells C57BL/6 were stimulated with IFN- $\beta$  or IFN- $\gamma$  or both for 0, 15, 30 and 60 mins and phosphorylation of STAT1 in CD4 T-cells was assessed by flow cytometry. b) IFN- $\beta$  requires IFN- $\gamma$  for optimal STAT1 signaling. C57BL/6 and IFN $\gamma$ R $^{-/-}$  spleen cells were stimulated with IFN- $\beta$  0, 15, 30 and 60 mins and phosphorylation of STAT1 in CD4 T-cells was assessed by flow cytometry. \* $p$ <0.05.

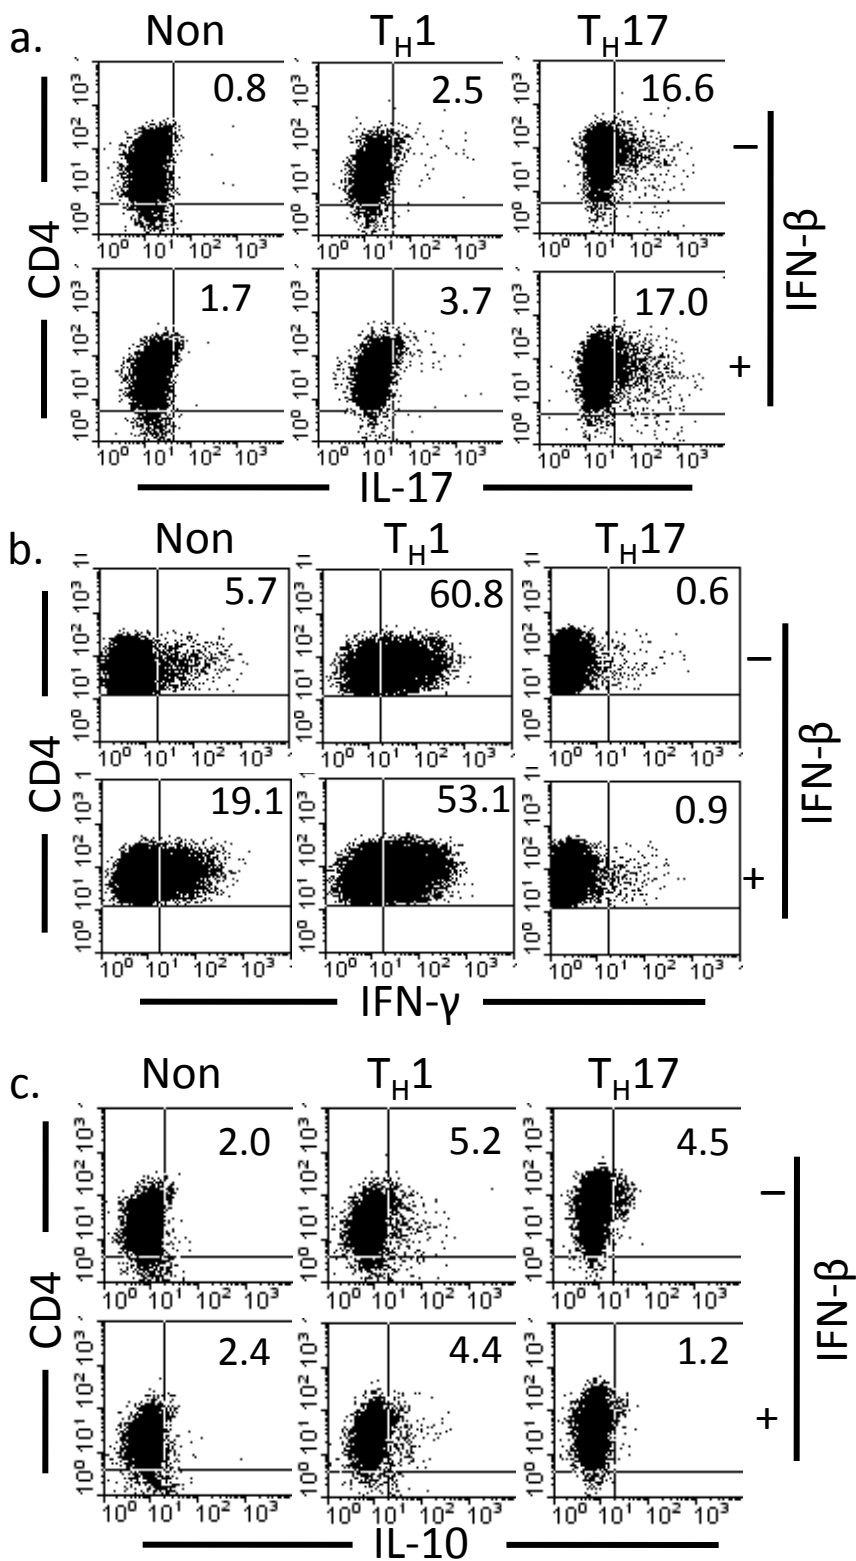

**Supplementary Fig. 2:** Direct effect of IFN- $\beta$  on CD4 T-cells. Purified CD4 T-cells were stimulated with plate-bound anti-CD3 and anti-CD28 in non-polarizing, T<sub>H</sub>1 and T<sub>H</sub>17 conditions in the presence or absence of IFN- $\beta$ . a) IL-17, b) IFN- $\gamma$  and c) IL-10 production in CD4 cells were assessed by flow cytometry.

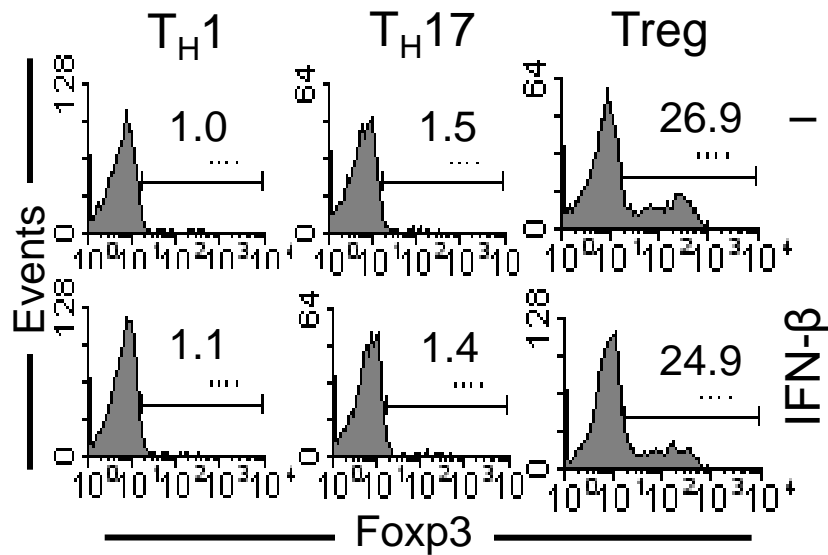

**Supplementary Fig. 3:** IFN- $\beta$  does not affect the differentiation of Foxp3<sup>+</sup> Tregs. CD8 depleted spleen cells stimulated with or without IFN- $\beta$  in TH1 (IL-12), TH17 (TGF $\beta$ /IL-6) and Treg (TGF $\beta$ ) conditions and percentage of CD4<sup>+</sup> FoxP3<sup>+</sup> cells was assessed by flow cytometry.

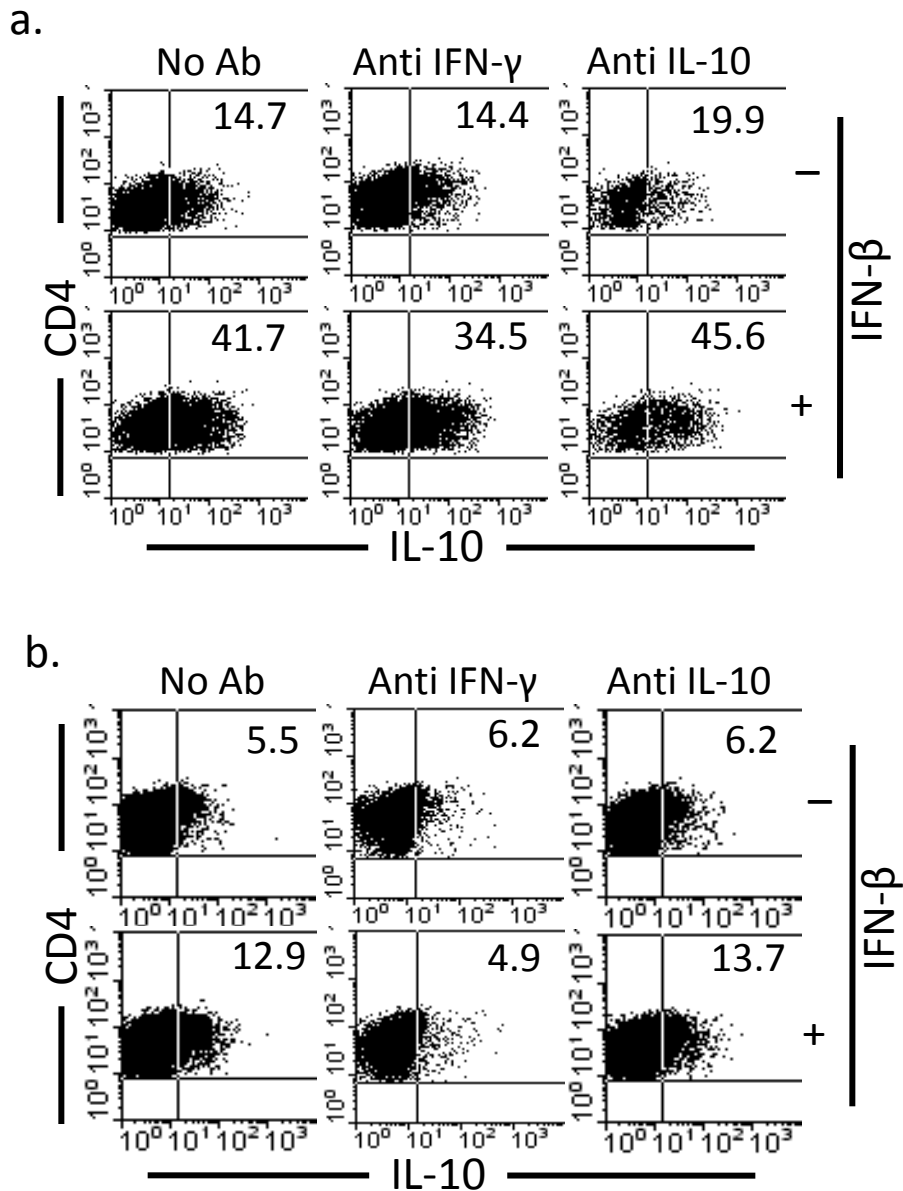

**Supplementary Fig. 4:** Effect of inhibiting IFN- $\gamma$  or IL-10 signaling during the induction of IL-10 by IFN- $\beta$  in a) T<sub>H</sub>1 conditions and b) T<sub>H</sub>17 conditions with APCs. CD8 depleted spleen cells were stimulated with or without IFN- $\beta$  in T<sub>H</sub>1 or T<sub>H</sub>17 conditions in the presence or absence of anti-IFN- $\gamma$  or anti-IL-10.

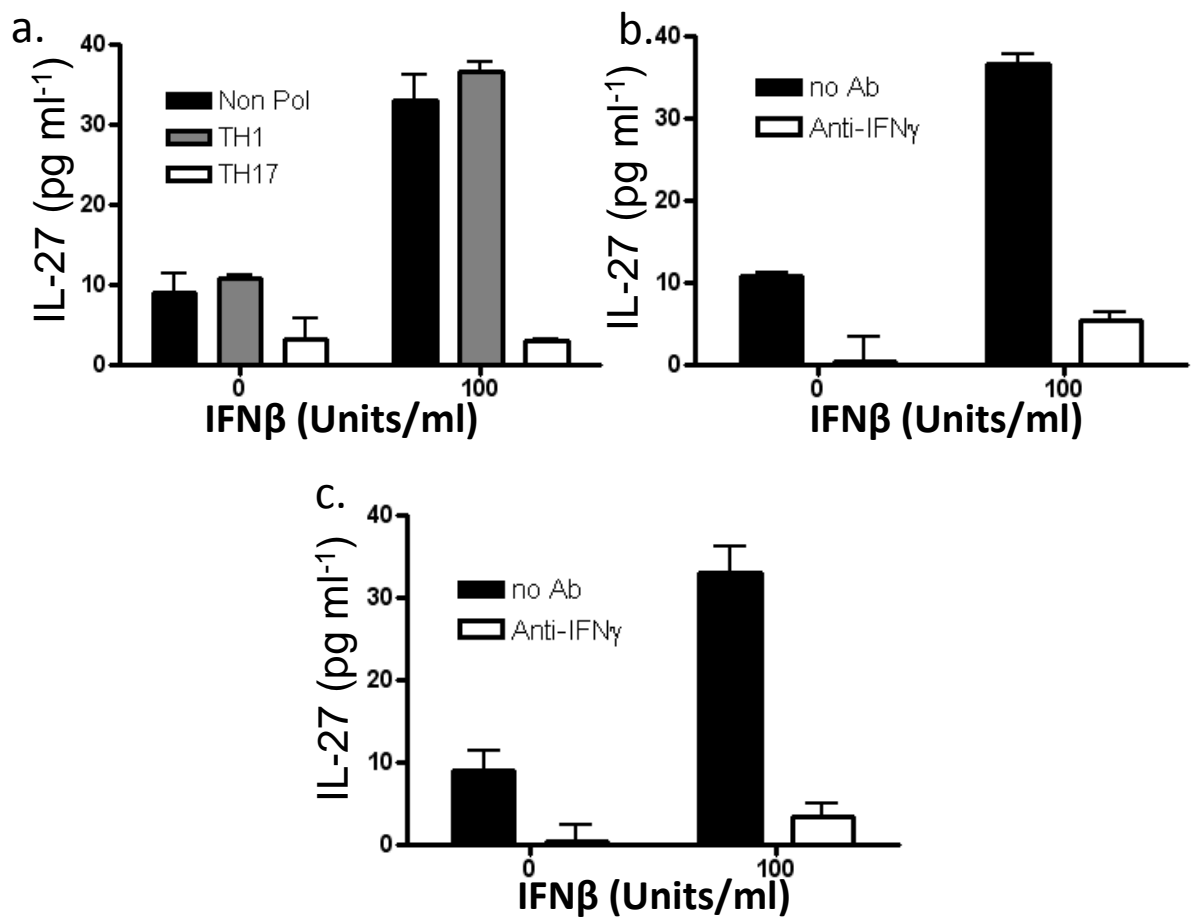

**Supplementary Fig. 5:** Effect of IFN- $\beta$  on IL-27. a) IFN- $\beta$  induces IL-27 in non-polarizing and T<sub>H</sub>1 conditions but not T<sub>H</sub>17 conditions. CD8 depleted spleen cells were stimulated with or without IFN- $\beta$  in non-polarizing, T<sub>H</sub>1, and T<sub>H</sub>17 conditions and IL-27 was analyzed by ELISA. (b and c) IFN- $\beta$  requires IFN- $\gamma$  to induce IL-27 in non-polarizing conditions (b) and T<sub>H</sub>1 conditions (c). CD8 depleted spleen cells were stimulated with or without IFN- $\beta$  in non-polarizing, T<sub>H</sub>1 conditions in the presence or absence of anti-IFN- $\gamma$  and IL-27 was analyzed by ELISA. Results for these experiments are the mean  $\pm$  SD of triplicates.

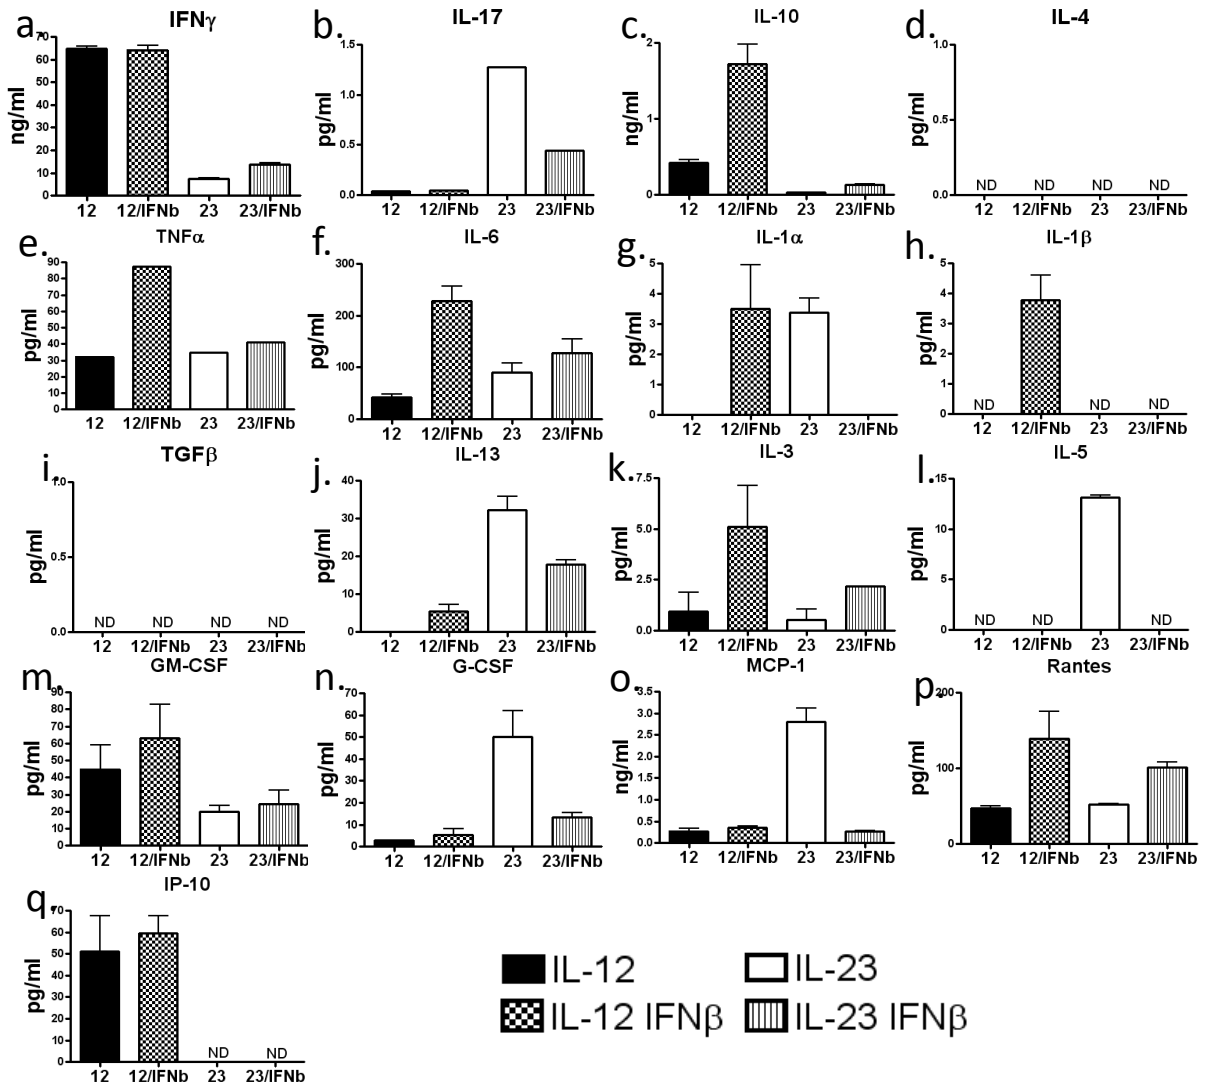

**Supplementary Fig. 6:** Effect of IFN- $\beta$  on chemokine/cytokine profiles in antigen specific T<sub>H</sub>1 and T<sub>H</sub>17 differentiation. Lymph nodes from MOG<sub>p35-55</sub> immunized mice were re-stimulated in MOG<sub>p35-55</sub> for 3 days with IL-12 or IL-23 in the presence or absence of IFN- $\beta$ . Chemokines and cytokines were assessed by Luminex multiplex analysis or ELISA.

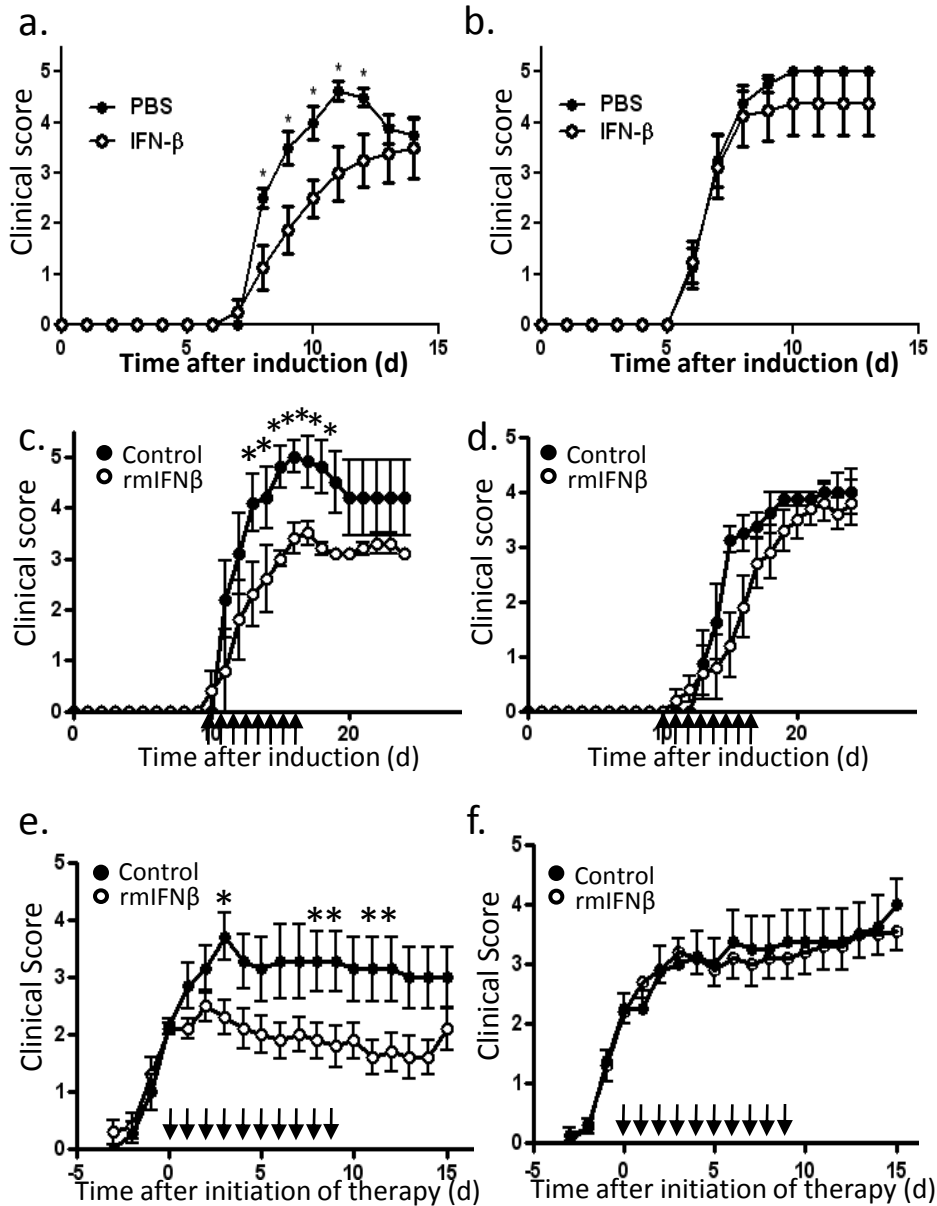

**Supplementary Fig. 7:** Effects of IFN- $\beta$  treatment in different EAE models. (a and b) Clinical scores from SJL mice with passive EAE induced by adoptive transfer of (a)  $T_H1$  and (b)  $T_H17$  cells that were treated with rmIFN- $\beta$  or PBS every second day from day 0 to 10 post transfer ( $n=6$  mice per group). (c and d) Clinical scores from (c) C57BL/6 and (d)  $IFN\gamma R^{-/-}$  mice treated daily with rmIFN- $\beta$  or PBS from day 10 to day 17 post EAE induction ( $n=4$  to 5 mice per group). (e and f) Clinical scores from (e) C57BL/6 and (f)  $IFN\gamma R^{-/-}$  mice treated daily for 10 days with rmIFN- $\beta$  or PBS beginning at disease score of 2 or 3 ( $n=6$  to 9 mice per group). Treatment doses indicated with arrows. \* $p < 0.05$ . Nature Medicine: doi:10.1038/nm.2110

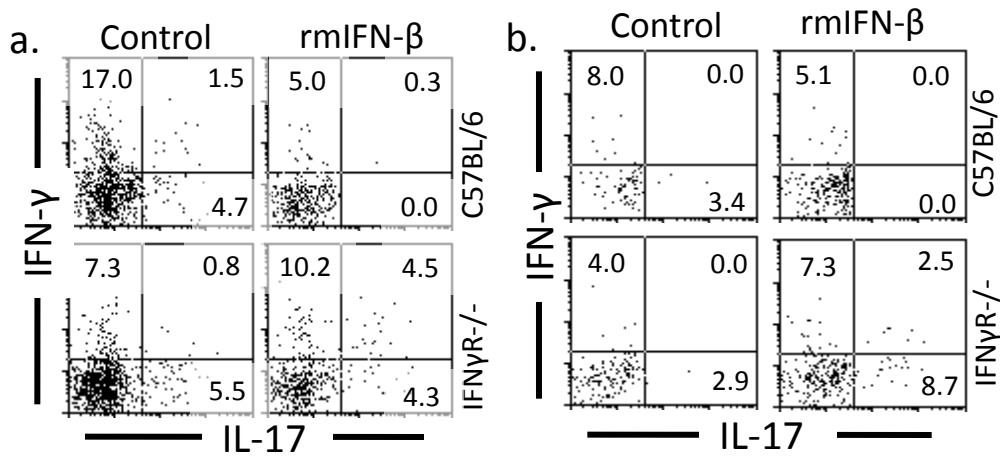

**Supplementary Fig. 8:** Frequencies of the IFN- $\gamma$  and IL-17 producing CD4 T-cells in the spinal cords (a) brainstem/cerebellum (b) 12 days post induction of EAE in C57BL/6 or IFN $\gamma$ R<sup>-/-</sup> mice treated with rmIFN- $\beta$  or PBS.



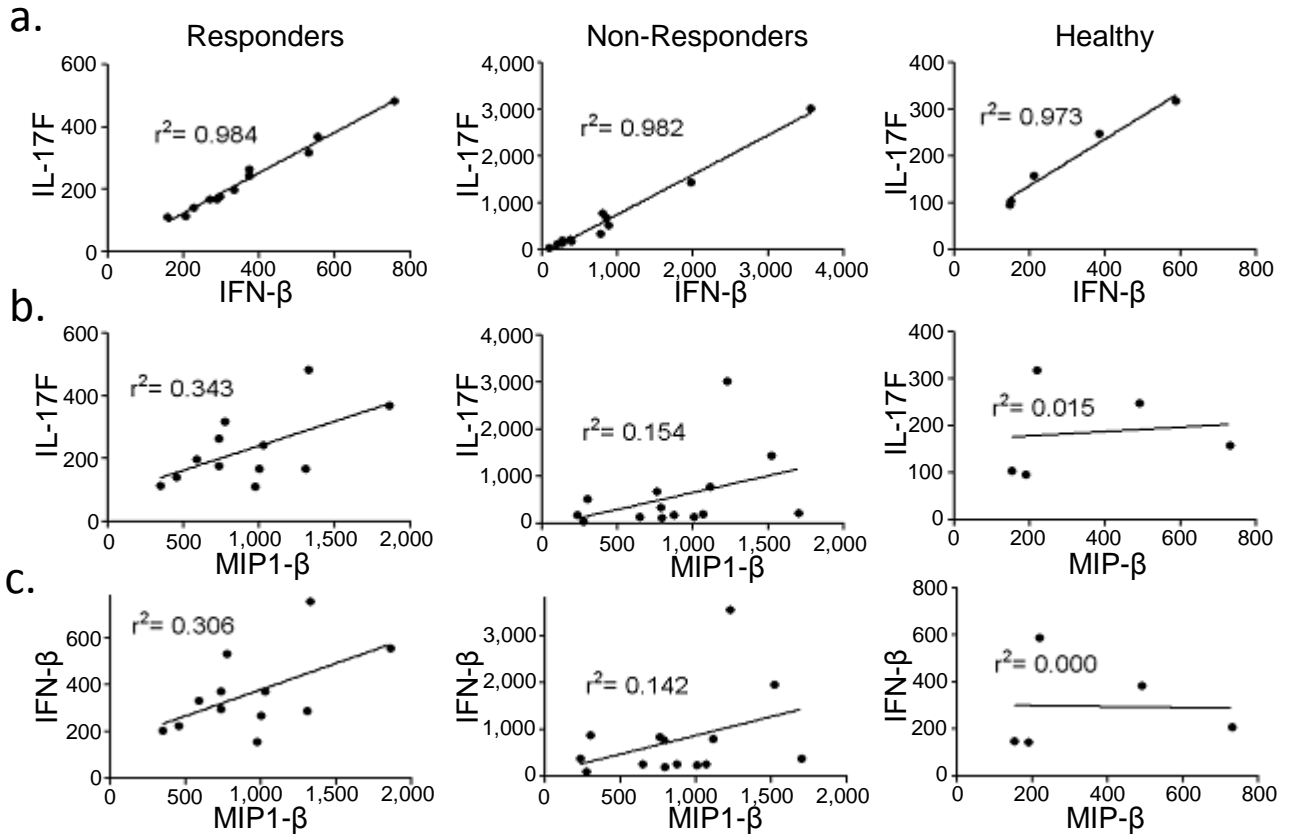

**Supplementary Fig. 9:** Correlation of a) IL-17F vs IFN- $\beta$  levels, b) IL-17F vs MIP1 $\beta$  levels and c) IFN- $\beta$  vs MIP1 $\beta$  in serum from responders, non-responders and healthy controls.  $R^2$  values close to 1 demonstrate that the cytokines are positively correlated.

**Supplementary Table 1. Demographic and clinical characteristics of patients with relapsing remitting multiple sclerosis and their clinical response to IFN- $\beta$  therapy.**

|                                                     | Responder         | Non-responder     |
|-----------------------------------------------------|-------------------|-------------------|
| Number                                              | 12                | 14                |
| Female/Male (n)                                     | 10/2              | 11/3              |
| Median age at onset (yr)                            | 27.6 [24.5; 35.8] | 26.7 [19.3; 36.0] |
| Median age at start IFN- $\beta$ (yr)               | 33.5 [30.3; 39.5] | 33.0 [23.0; 37.8] |
| Median EDSS score around start IFN- $\beta$         | 2.5 [2.0; 3.5]    | 2.5 [1.8; 4.3]    |
| Relapse rate in 2 yrs before start IFN- $\beta$     | 2 [2-3]           | 2 [1-3]           |
| Relapse rate in 2 yrs after start IFN- $\beta$      | 0 [0; 0]          | 2 [1.5; 2.0]      |
| Steroid interventions before start IFN- $\beta$ (n) | 0 [0; 2]          | 1 [0; 3]          |
| Steroid interventions after start IFN- $\beta$ (n)  | 0 [0; 0.5]        | 2 [1; 3]          |
| Duration of IFN- $\beta$ treatment (months)         | 80 [46; 141]      | 56 [38; 104]      |
| Avonex                                              | 4                 | 5                 |
| Rebif                                               | 2                 | 8                 |
| Betaferon                                           | 6                 | 1                 |

Median values are shown with 25 and 75 percentiles.

IFN- $\beta$  = Interferon-beta.

EDSS = Expanded Disability Status Scale

## Supplementary Methods.

**Mice.** SJL, and  $Ifngr1^{tm/Agt/J}$  ( $Ifngr1^{-/-}$ ) mice were purchased from Jackson Laboratory and C57BL/6 mice were purchased from Jackson Lab or NCI-Fredrick bred at Stanford and/or UAB. B6  $Stat1^{-/-}$  mice were provided by R. Lorenz (UAB). All animals were housed and treated in accordance to with institutional guidelines and approved by the IACUC.

**EAE induction.** Age and sex matched C57BL/6 and  $Ifngr1^{-/-}$  mice were induced with EAE by an immunization 150  $\mu$ g of MOG p35–55 (Biosynthesis) emulsified in CFA followed by an intraperitoneal injection of with 500 ng of *Bordetella pertussis* toxin (Difco Laboratories) in PBS at the time of, and two days following immunization.

The typical clinical manifestation of EAE in C57BL/6 mice is a progressive ascending paralysis which starts in the tail and leads to forelimb paralysis. In mice with decreased IFN- signaling, EAE symptoms are atypical and characterized by defects in proprioception with axial rotatory movement and ataxia with little hind limb paralysis<sup>1,2</sup>. Typical EAE symptoms monitored daily using a standard clinical score ranging: 1) Loss of tail tone, 2) incomplete hind limb paralysis, 3) complete hind limb paralysis, 4) forelimb paralysis, 5) moribund/dead. Atypical EAE symptoms were scored as follows: 1) hunched appearance, slight head tilt, 2) severe head tilt, 3) slight axial rotation/staggered walking, 4) severe axial rotation/spinning, 5) moribund/dead. In our experiments, we observed that 60-80% of the IFN-  $R^{-/-}$  mice exhibited atypical EAE (scoring described in the methods) and this was not affected by IFN- treatment.

**Naïve Human CD4 T-cell Isolation.** We obtained peripheral blood mononuclear cells from healthy donors (Stanford Blood Center) by centrifugation through Ficoll (Histopaque 1077; Sigma). CD4<sup>+</sup> T cells were isolated by magnetic bead depletion of CD19<sup>+</sup>, CD14<sup>+</sup>, CD56<sup>+</sup>, CD16<sup>+</sup>, CD36<sup>+</sup>, CD123<sup>+</sup>, CD8<sup>+</sup>, T cell receptor- and T cell receptor- $\delta$  positive and glycoprotein A-positive

cells on an AutoMACS instrument (Miltenyi Biotec). Naive CD45RA<sup>+</sup> T cells were obtained by depletion with anti-CD45RO and anti-CD25 magnetic beads (Miltenyi Biotec).

## References

1. Wensky, A.K. et al. IFN-gamma determines distinct clinical outcomes in autoimmune encephalomyelitis. *J Immunol* **174**, 1416-23 (2005).
2. Stromnes, I.M., Cerretti, L.M., Liggitt, D., Harris, R.A. & Goverman, J.M. Differential regulation of central nervous system autoimmunity by T(H)1 and T(H)17 cells. *Nat Med* **14**, 337-42 (2008).
